# Supplementary material
Source: HighWire-hosted journal article supplement (https://jmg.bmj.com/highwire/filestream/188761/field_highwire_adjunct_files/4/jmg-2023-109329supp005_data_supplement.pdf)
Supplement: jmg-2023-109329supp005_data_supplement.pdf [file jmg-2023-109329supp005_data_supplement.pdf]

**Supplementary Table 4. Phenotypic data for kEDS Patients.**

| Patient ID | Age | Sex | Beighton score | cEDS           |                | vEDS           |                | hEDS           |                | kEDS    | Other features   | Vascular/cardiac complications                   | Family History                            |                      |
|------------|-----|-----|----------------|----------------|----------------|----------------|----------------|----------------|----------------|---------|------------------|--------------------------------------------------|-------------------------------------------|----------------------|
|            |     |     |                | Major criteria | Minor criteria | Major criteria | Minor criteria | Major criteria | Minor criteria |         |                  |                                                  |                                           | Major criteria       |
| 821        | 0-9 | M   | –              | C              | e              | –              | –              | H              | –              | J, K, L | pectus carinatum | –                                                | Brother: Kyphosis, GIH, gross motor delay |                      |
| 1396       | 0-9 | M   | 7              | C              | e, f           | –              | –              | H              | u              | J       | w                | umbilical hernia<br>cutis laxa<br>talipes valgus | –                                         | Mother, Sister: hEDS |

EDS Diagnostic Criteria and Abbreviations as per lists in Supplementary Table 1.
